# Supplementary material for: Unraveling the Bombus terrestris Hemolymph, an Indicator of the Immune Response to Microbial Infections, through Complementary Mass Spectrometry Approaches
Source: MDPI journal article supplement (doi:10.3390/ijms24054658), 2023-02-28
Supplement: s1 [file s1]

## GLYCOLYSIS / GLUCONEOGENESIS

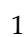

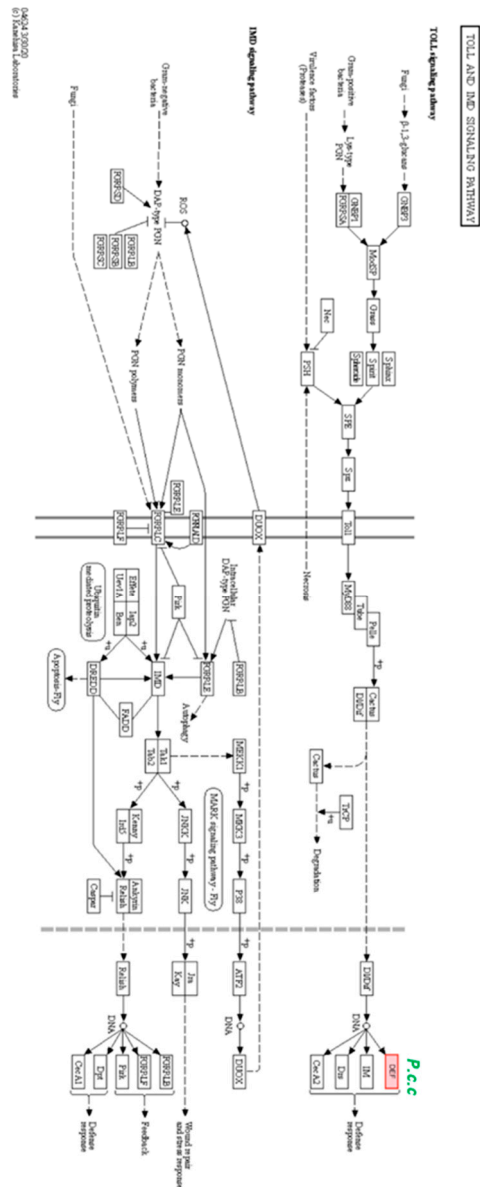

**Figure S2:** Toll and Imd signaling pathway impacted by *Pectobacterium carotovorum* subsp. *carotovorum* (*P. c. c.*) infection showing Defensin 1 (DEF).
